# Supplementary material for: IL-17RA Signaling Reduces Inflammation and Mortality during Trypanosoma cruzi Infection by Recruiting Suppressive IL-10-Producing Neutrophils
Source: PubMed Central journal article supplement (PMC3343119; doi:10.1371/journal.ppat.1002658), 2012-04-26

**Figure S1**

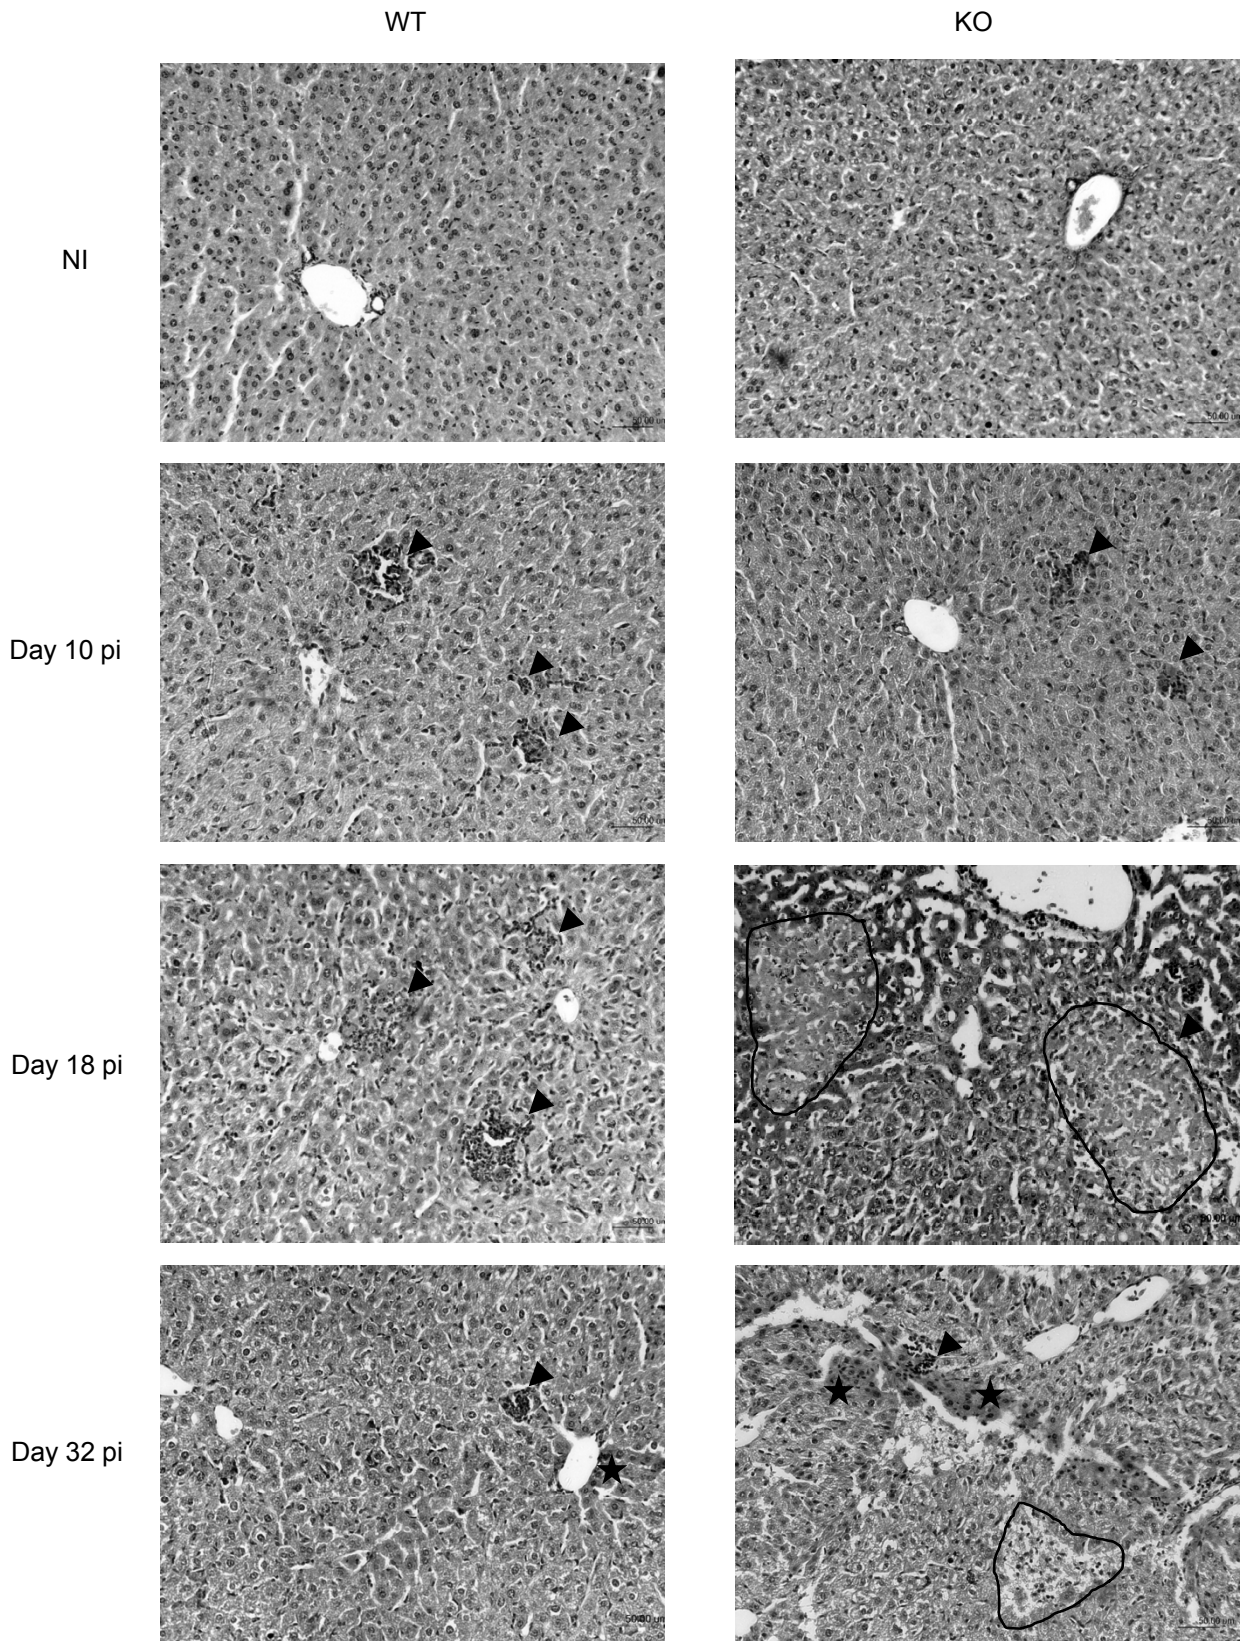

Figure S2

A

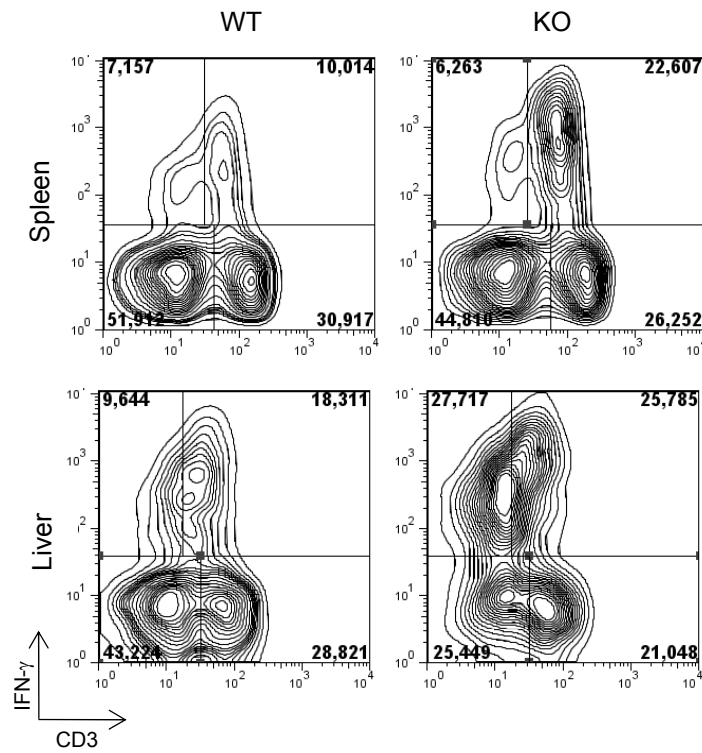

B

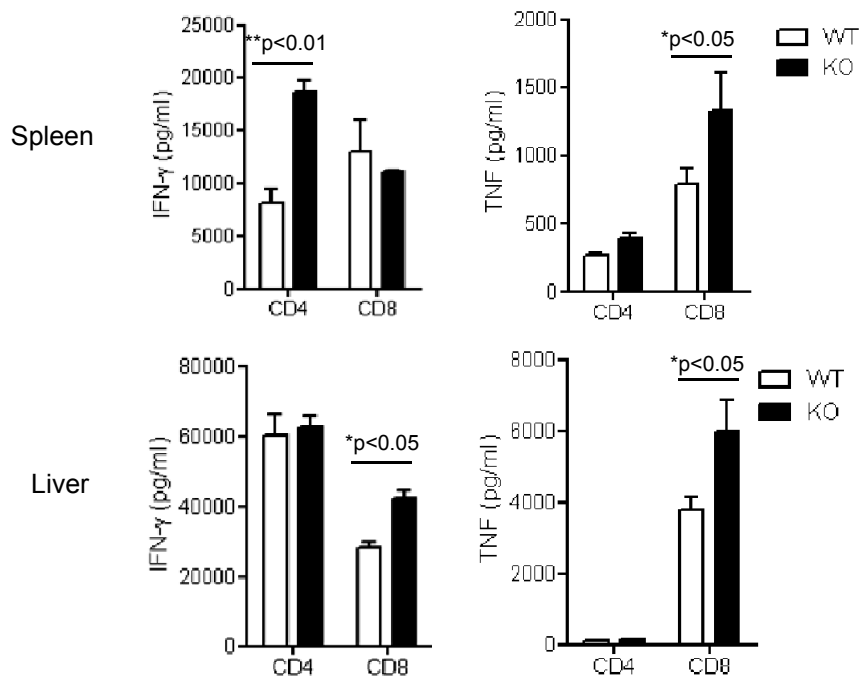

**Figure S3**

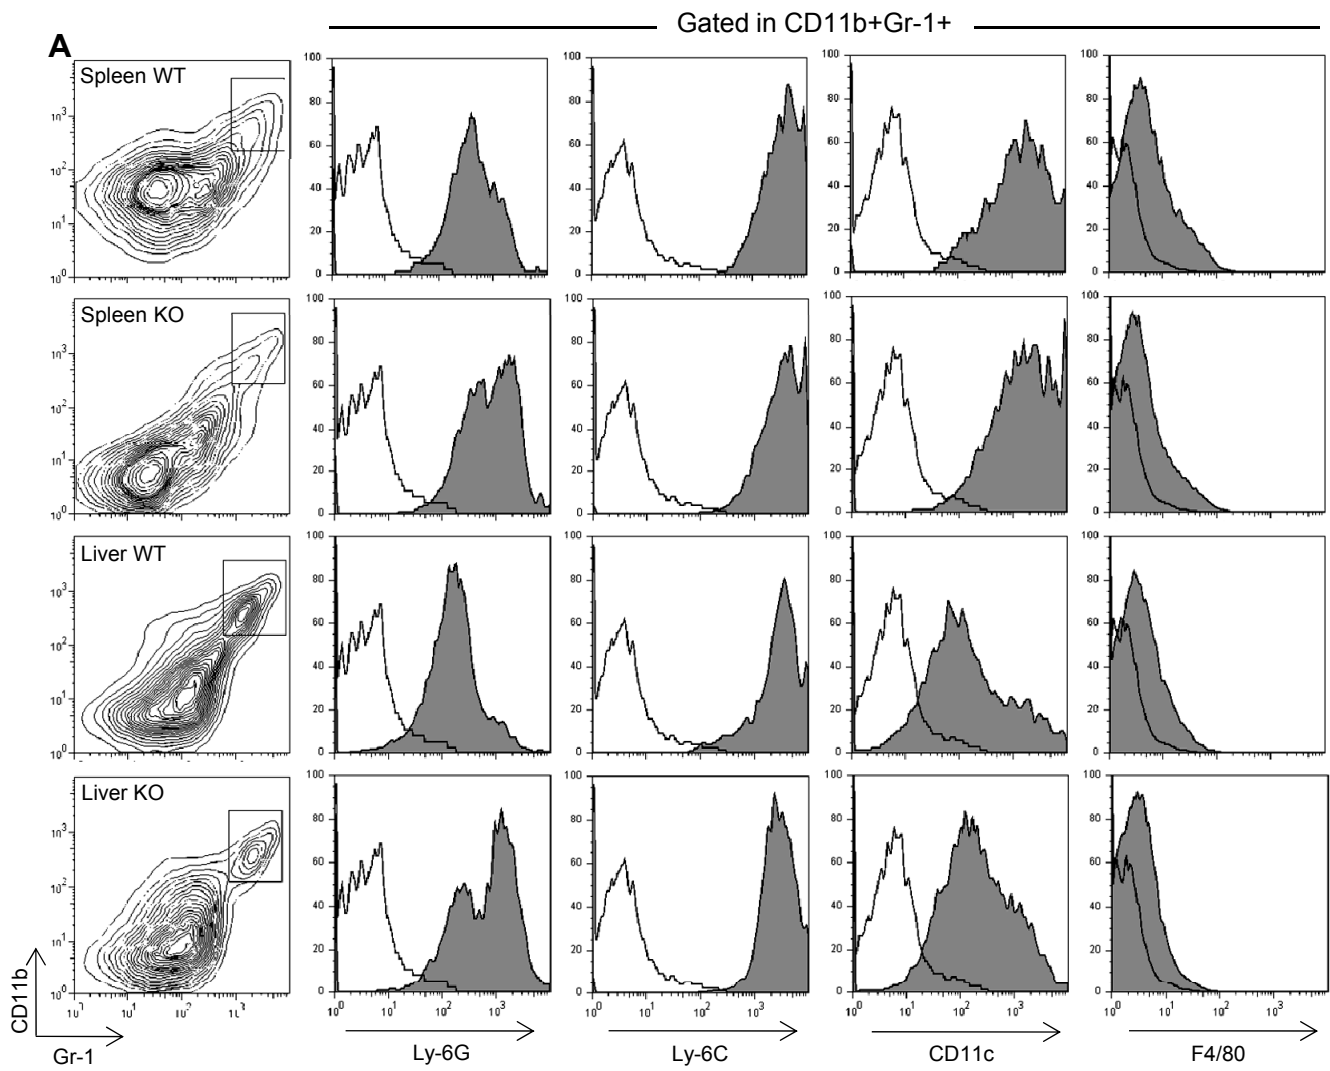

**B**

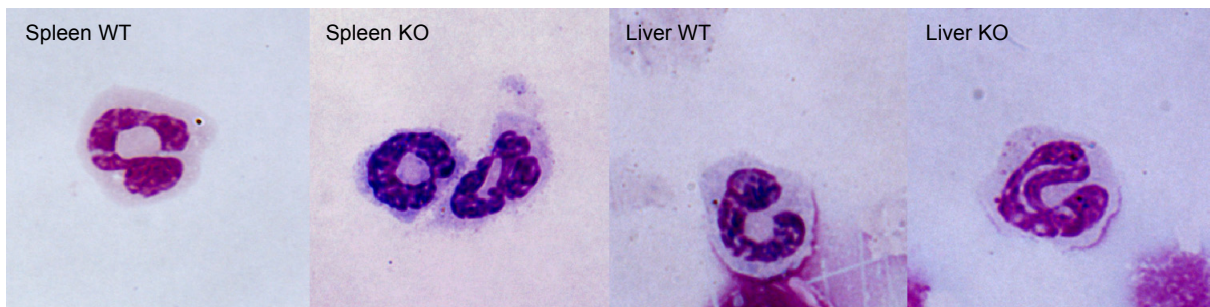

**Figure S4**

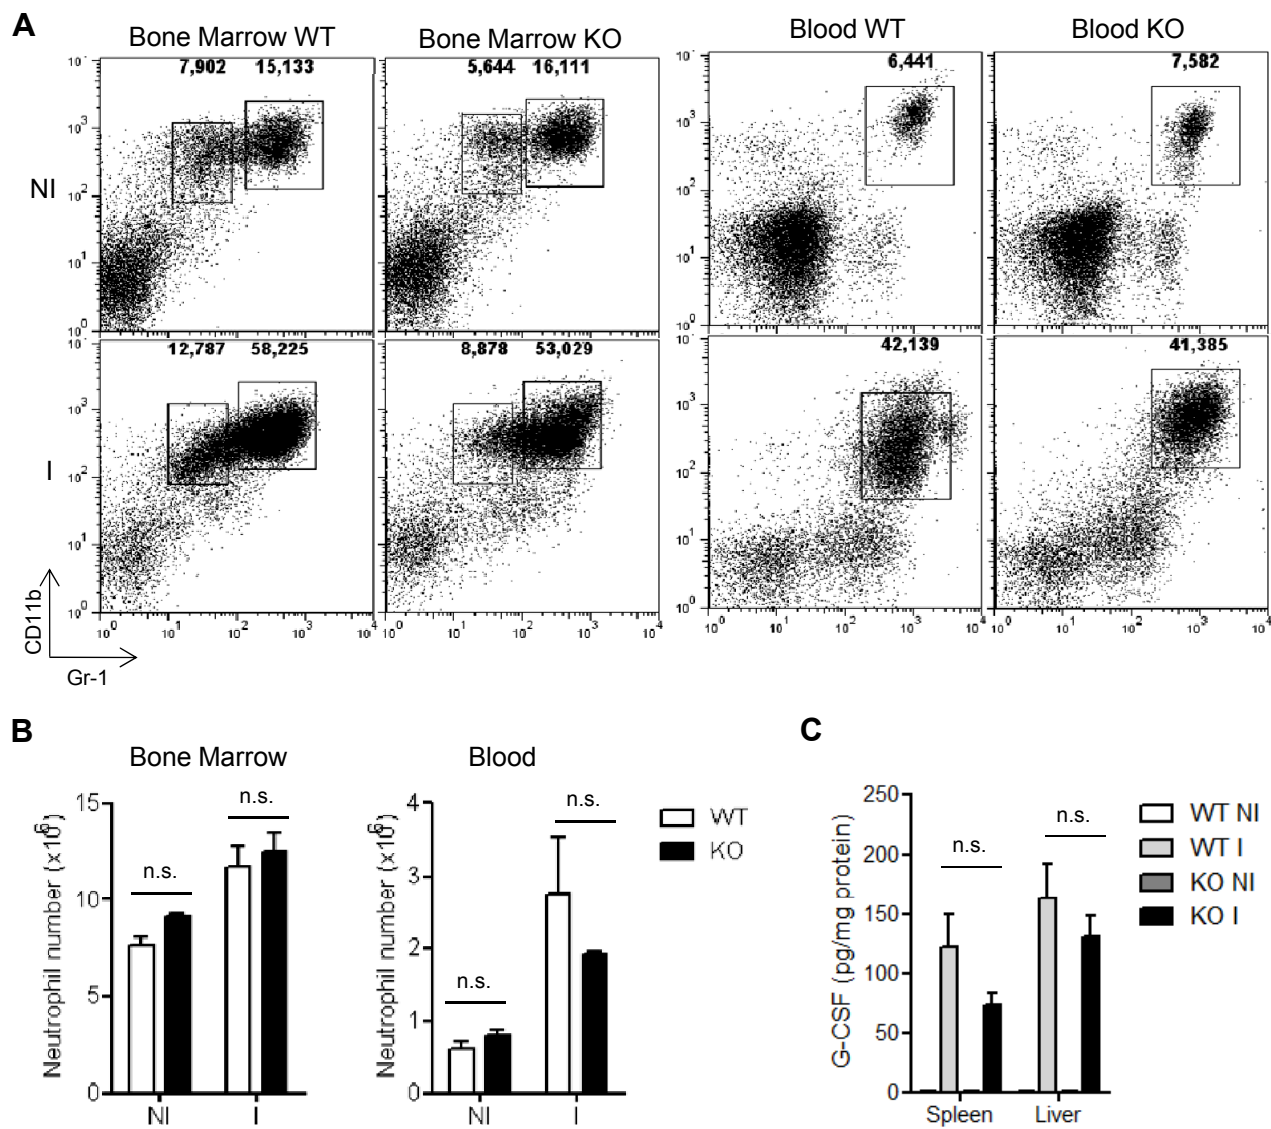

Figure S5

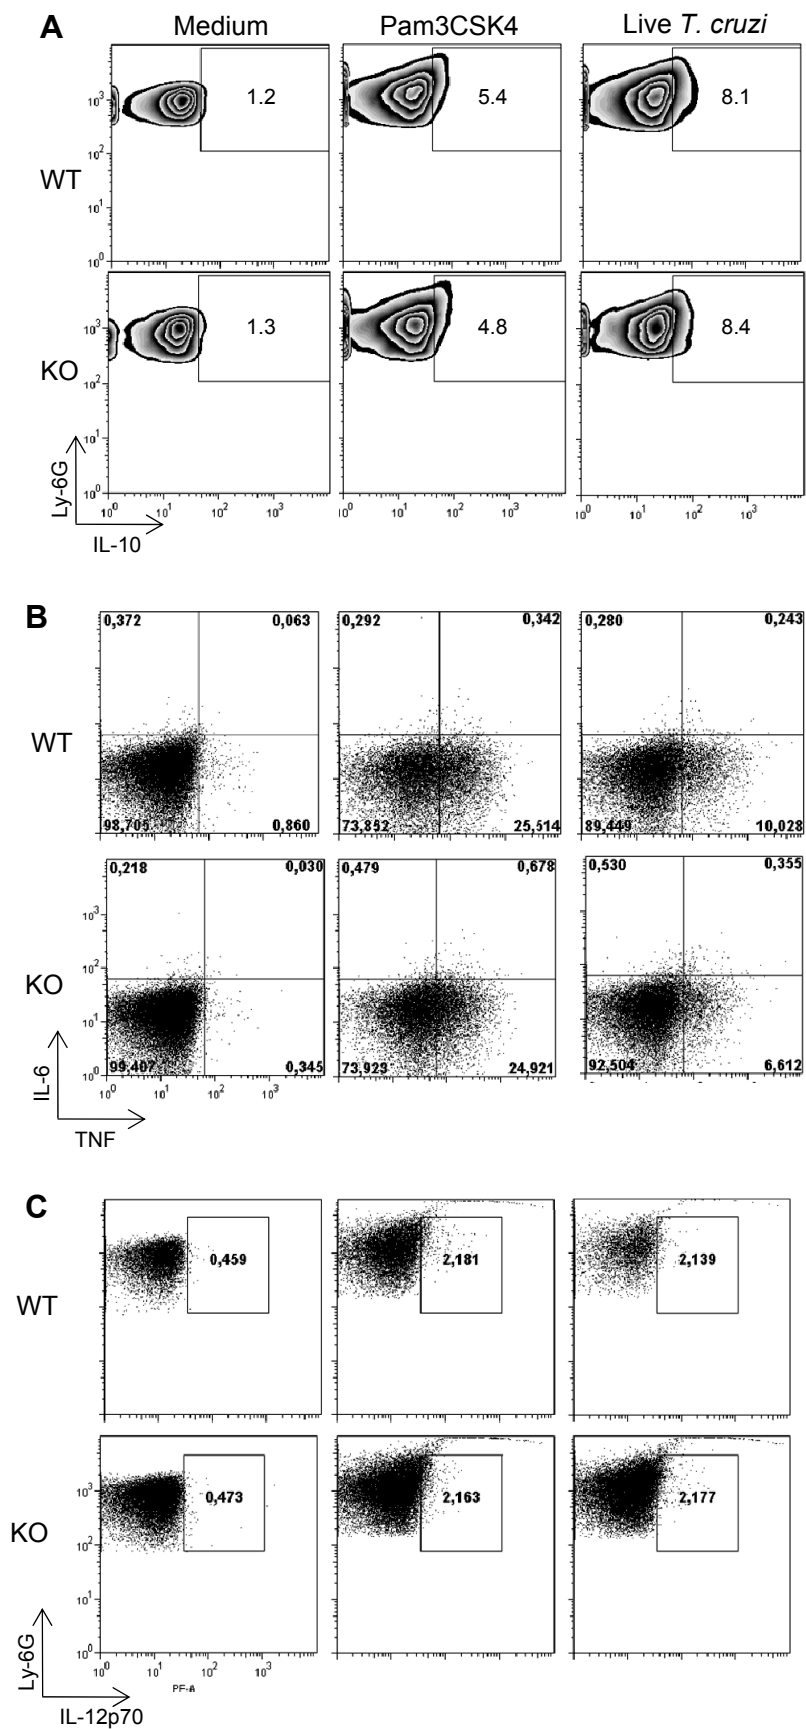

**Figure S6**

**A**

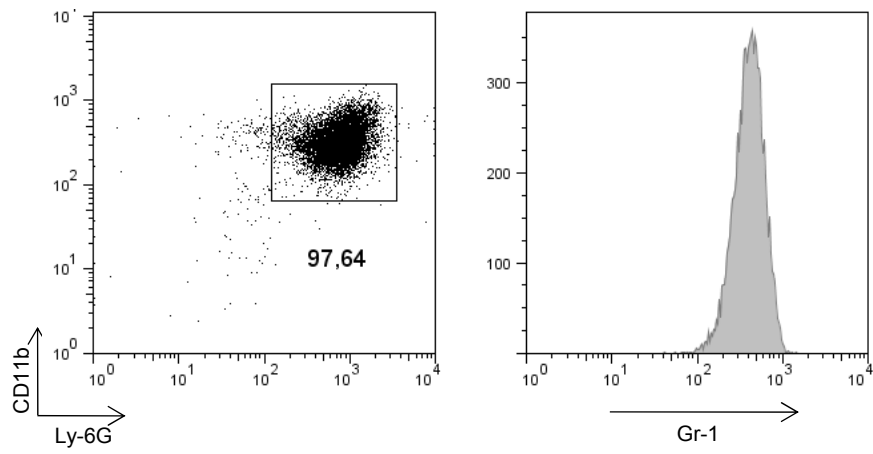

**B**

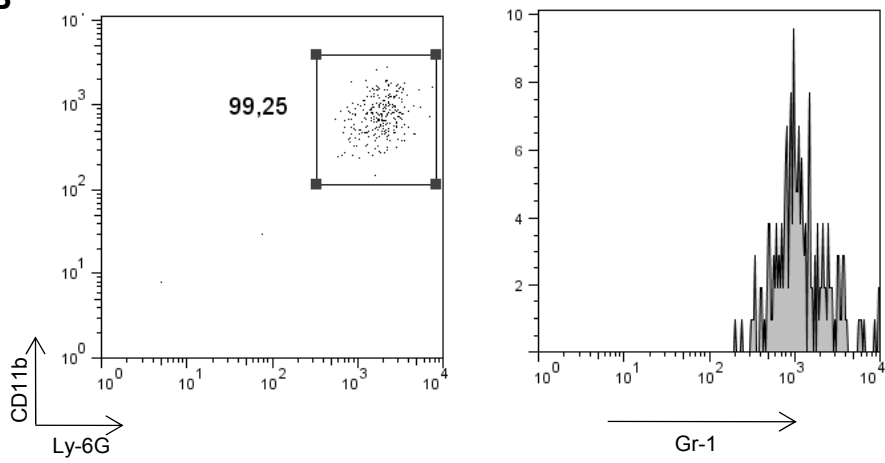

Supplement: ppat.1002658.s001.pdf [file ppat.1002658.s001.pdf]
